# Supplementary material for: Design of a yolk–shell ternary metal sulfide with a tunable structure for high-performance electromagnetic wave absorption
Source: Royal Society of Chemistry journal article supplement (doi:10.1039/d4nr01641f), 2024-01-01
Supplement: d4nr01641f1.pdf [file d4nr01641f1.pdf]

## Supplementary Information

### Design of yolk-shell ternary metal sulfide with tunable structure for high-performance electromagnetic wave absorption

Zhaobo Liu,<sup>a</sup> Yan Zhao<sup>\*a</sup> and Zhiwei Liu<sup>\*a</sup>

<sup>a</sup> School of Materials Science and Engineering, Beihang University, Beijing, 100191, China

\* Corresponding author E-mail addresses: jennyzhaoyan@buaa.edu.cn (Y. Zhao),

\* Corresponding author E-mail addresses: lzwbuaa@163.com (Z. Liu).

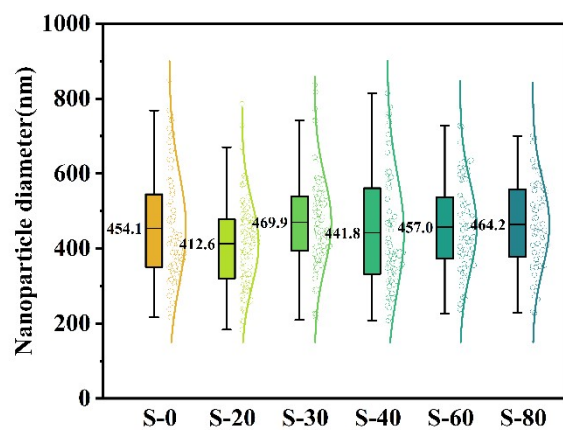

Figure S1. Particle size distribution and average diameter of different samples

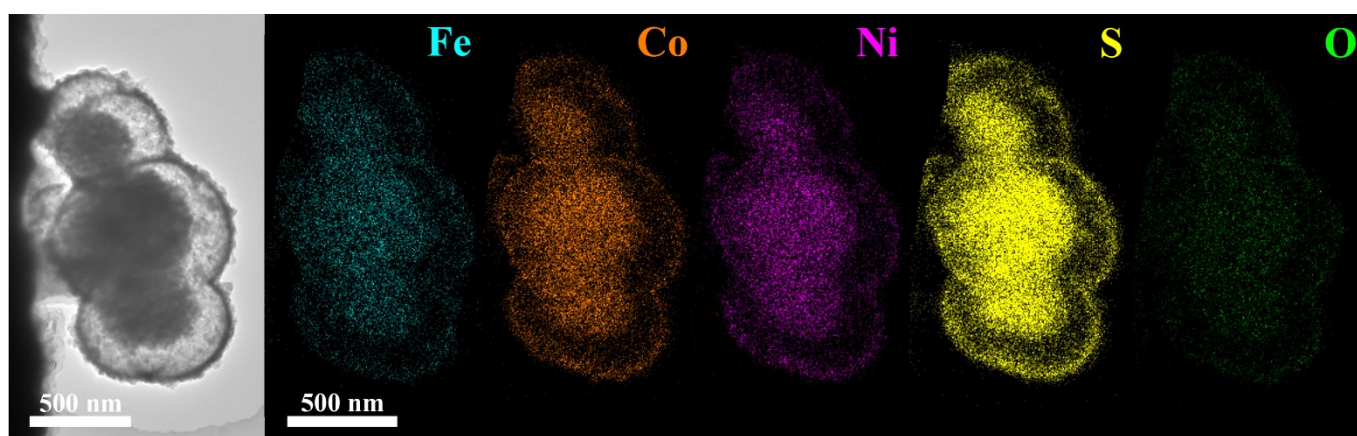

Figure S2. Elemental mapping images of energy dispersive X-ray spectroscopy (EDS) for S-40.

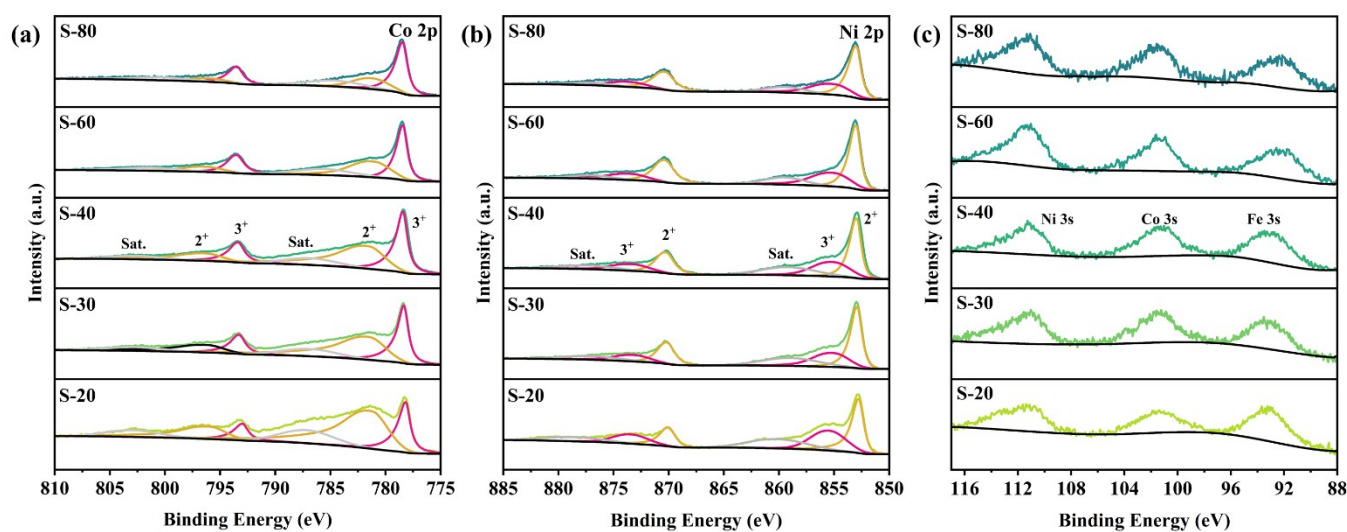

Figure S3. Deconvoluted XPS spectra of (a) Co 2p, (b) Ni 2p, (c) Fe 3s, Co 3s and Ni 3s.

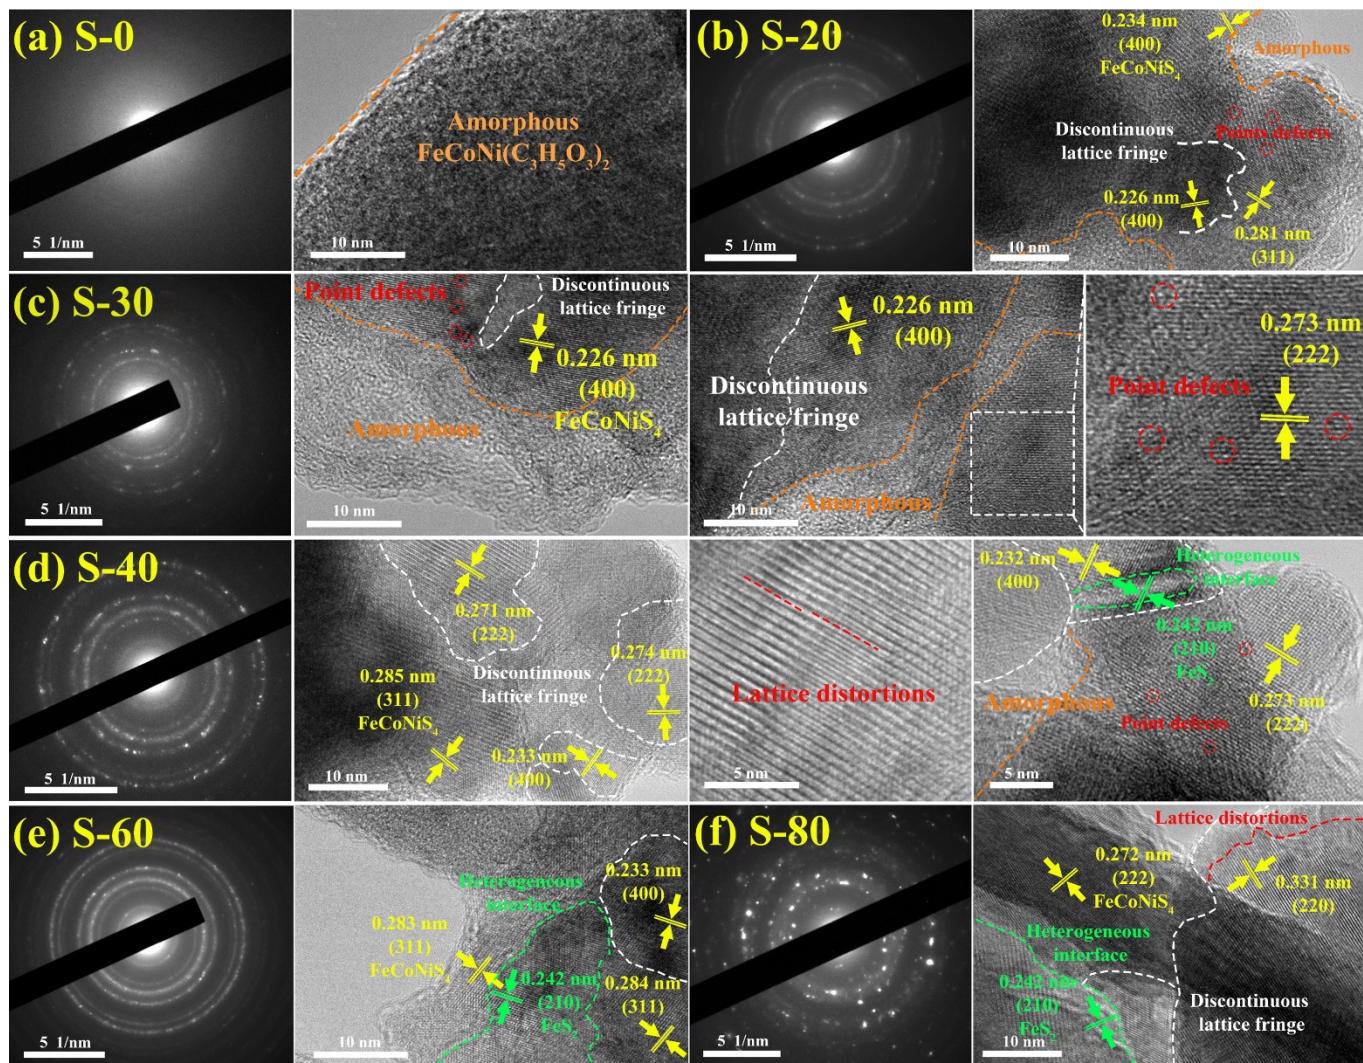

Figure S4. Selected area electron diffraction (SAED) patterns and high-resolution transmission electron microscopy (HR-TEM) images for (a) S-0, (b) S-20, (c) S-30, (d) S-40, (e) S-60 and (f) S-80.

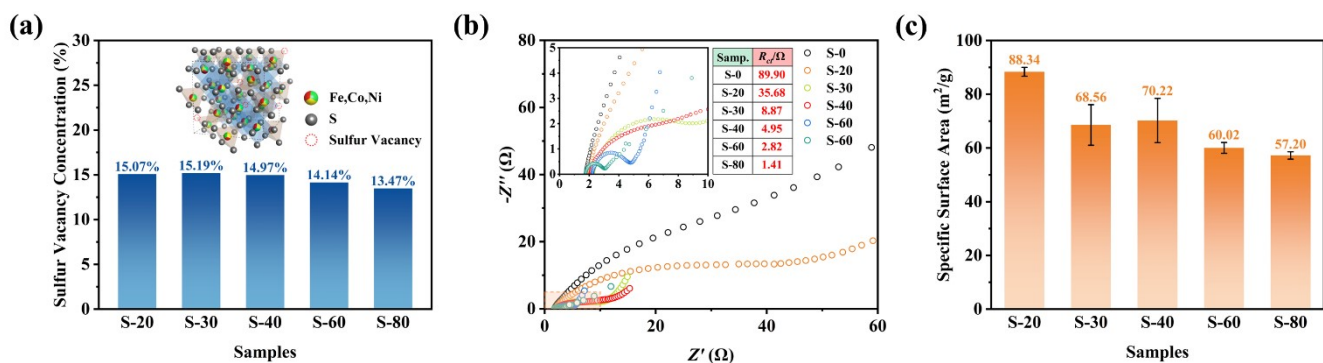

Figure S5. (a) Histogram of the calculated sulfur vacancy concentration; (b) Nyquist plots from the electronic impedance spectra (EIS) test; (c) Brunauer-Emmett-Teller (BET) analysis results obtained by  $N_2$  adsorption-desorption measurement at 77K.

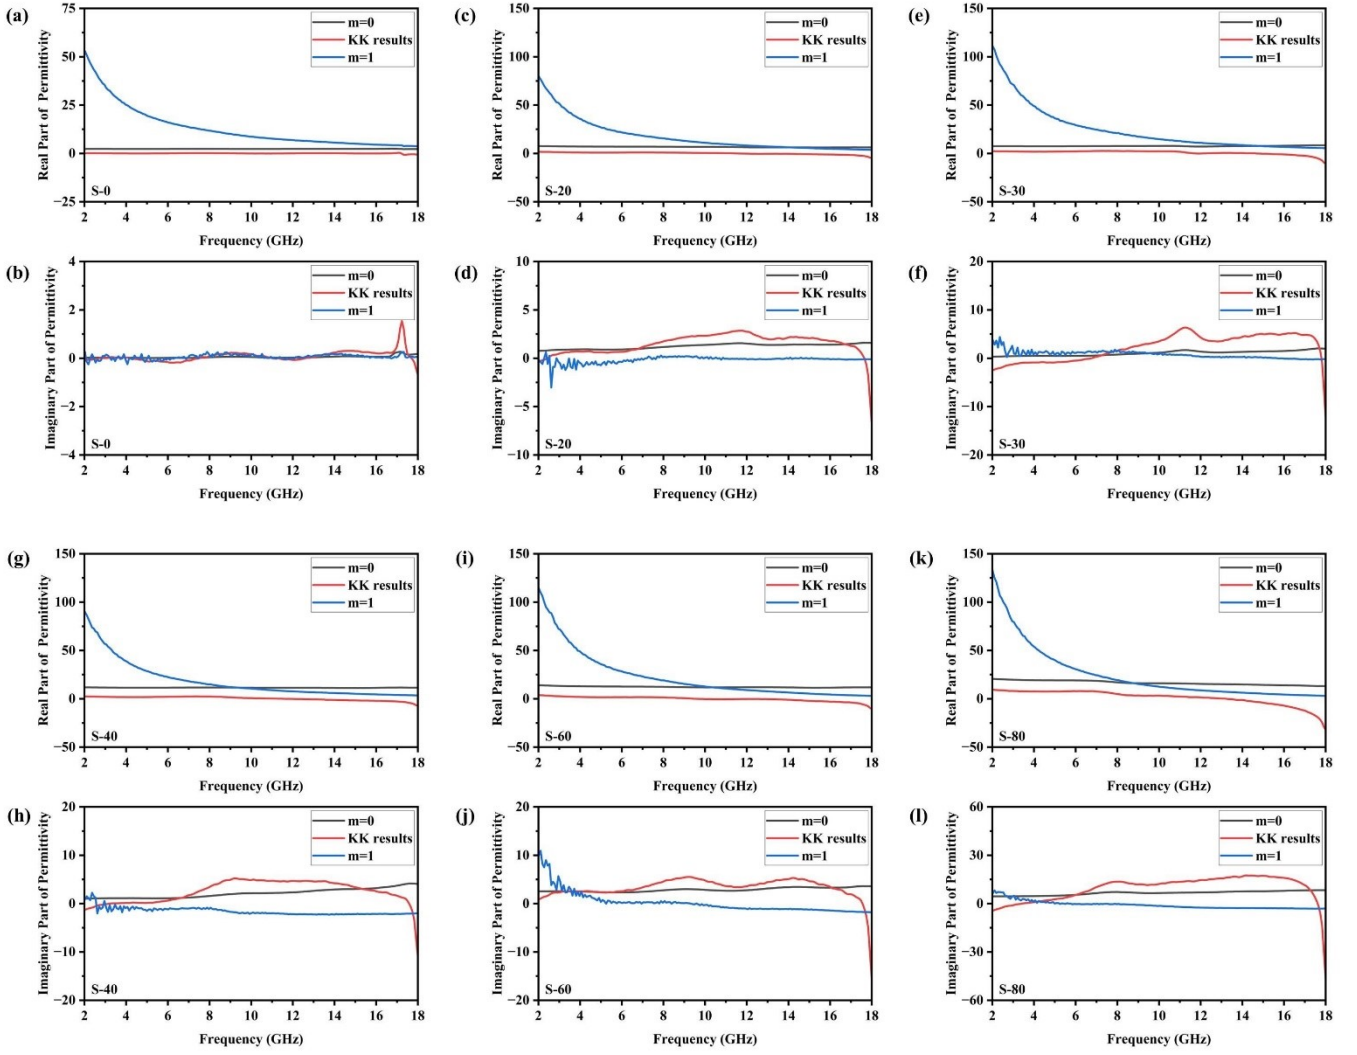

**Figure S6.** The real and imaginary parts of the permittivity of different  $m$  values and Kramers-Kronig (KK) analysis results for (a,b) S-0, (c,d) S-20, (e,f) S-30, (g,h) S-40 (i,j) S-60 and (k,l) S-80.

In the process of calculating permittivity based on scattering parameters, different  $m$  values were selected for calculation and Kramers-Kronig (KK) analysis was carried out, the results were shown in **Figure S6**. It can be obviously found that the measure results with  $m=0$  agree best with the KK analysis results, which verified the validity of test results. Then we conduct the subsequent absorption performance analysis according to the dielectric parameters with  $m=0$ .

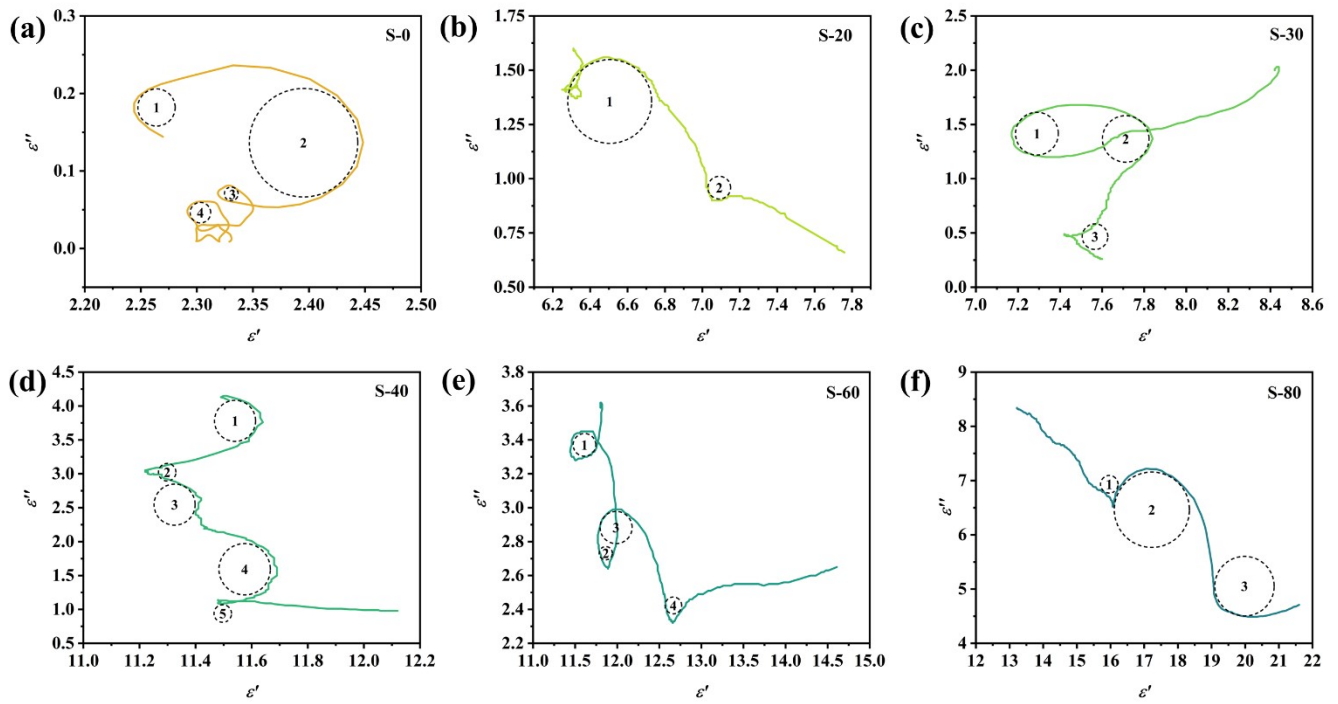

Figure S7. Cole-Cole semicircles of (a) S-0, (b) S-20, (c) S-30, (d) S-40, (e) S-60 and (f) S-80.

Table S1. Comparison of standard X-ray diffraction patterns of different spinel metal sulfides

| crystallographic planes | This work<br>$2\theta/^\circ$ | Ni <sub>3</sub> S <sub>4</sub><br>(PDF#01-076-1813)<br>$2\theta/^\circ$ | Co <sub>3</sub> S <sub>4</sub><br>(PDF#01-072-8728)<br>$2\theta/^\circ$ | CoNi <sub>2</sub> S <sub>4</sub><br>(PDF#01-073-1297)<br>$2\theta/^\circ$ | NiCo <sub>2</sub> S <sub>4</sub><br>(PDF#01-073-1704)<br>$2\theta/^\circ$ | FeNi <sub>2</sub> S <sub>4</sub><br>(PDF#01-073-8669)<br>$2\theta/^\circ$ |
|-------------------------|-------------------------------|-------------------------------------------------------------------------|-------------------------------------------------------------------------|---------------------------------------------------------------------------|---------------------------------------------------------------------------|---------------------------------------------------------------------------|
| (220)                   | 26.8                          | 26.639                                                                  | 26.786                                                                  | 26.734                                                                    | 26.841                                                                    | 26.619                                                                    |
| (311)                   | 31.6                          | 31.346                                                                  | 31.520                                                                  | 31.459                                                                    | 31.585                                                                    | 31.322                                                                    |
| (400)                   | 38.3                          | 38.029                                                                  | 38.243                                                                  | 38.168                                                                    | 38.323                                                                    | 38.000                                                                    |
| (422)                   | 47.4                          | 47.036                                                                  | 47.306                                                                  | 47.210                                                                    | 47.407                                                                    | 46.999                                                                    |
| (511)                   | 50.4                          | 50.079                                                                  | 50.369                                                                  | 50.266                                                                    | 50.477                                                                    | 50.039                                                                    |
| (440)                   | 55.3                          | 54.873                                                                  | 55.196                                                                  | 55.081                                                                    | 55.316                                                                    | 54.829                                                                    |

Table S2. Comparison of Raman vibration modes in this work with references

| Ref.                                  | $A_g/cm^{-1}$ | $E_g/cm^{-1}$ | $T_{2g,1}/cm^{-1}$ | $T_{2g,2}/cm^{-1}$ |
|---------------------------------------|---------------|---------------|--------------------|--------------------|
| This work                             | 376-383       | 249           | 346                | 300                |
| 1 (CoNi <sub>2</sub> S <sub>4</sub> ) | 386           | 230           | 351                | 299                |
| 2 (FeS <sub>2</sub> )                 | 372           | 337           | -                  | -                  |

Table S3. Peak areas (CPS.eV) and atomic% of Fe 3s (92.8 eV), Co 3s (101.1 eV) and Ni 3s (111.4eV) in XPS spectra of different samples

| Samples             | Fe 3s (CPS.eV) | Co 3s (CPS.eV) | Ni 3s (CPS.eV) | Fe 3s<br>ratio (%) | Co 3s<br>ratio (%) | Ni 3s<br>ratio (%) |
|---------------------|----------------|----------------|----------------|--------------------|--------------------|--------------------|
| Sensitivity factors | 0.548          | 0.606          | 0.671          |                    |                    |                    |
| S-20                | 8498.88        | 7623.10        | 9625.94        | 36.55              | 29.64              | 33.81              |
| S-30                | 9187.05        | 9805.61        | 11059.36       | 33.92              | 32.74              | 33.35              |
| S-40                | 9211.39        | 9559.52        | 10473.28       | 34.88              | 32.73              | 32.39              |
| S-60                | 8881.00        | 9494.73        | 11636.28       | 32.93              | 31.84              | 35.24              |
| S-80                | 6204.80        | 7005.11        | 8101.82        | 32.39              | 33.07              | 34.54              |

**Table S4.** Peak areas (CPS.eV) of S 2p, O 1s O-M (530.1 eV) in XPS spectra of different samples

| Samples             | S 2p<br>(CPS.eV) | O 1s<br>O-M<br>(CPS.eV) | S 2p<br>after correction<br>(CPS.eV) | O1s O-M<br>after correction<br>(CPS.eV) | FeCoNiS <sub>4</sub> ratio<br>(%) | FeCoNi<br>(C <sub>3</sub> H <sub>5</sub> O <sub>3</sub> ) <sub>2</sub> ratio<br>(%) |
|---------------------|------------------|-------------------------|--------------------------------------|-----------------------------------------|-----------------------------------|-------------------------------------------------------------------------------------|
| Sensitivity factors | 1.881            | 2.881                   |                                      |                                         |                                   |                                                                                     |
| S-20                | 68806.70         | 100401.54               | 36579.85                             | 34849.55                                | 61.16                             | 38.84                                                                               |
| S-30                | 115706.32        | 75597.17                | 61513.20                             | 26239.91                                | 77.86                             | 22.14                                                                               |
| S-40                | 130895.62        | 67279.39                | 69588.31                             | 23352.79                                | 81.72                             | 18.28                                                                               |
| S-60                | 179418.38        | 13701.87                | 95384.57                             | 4755.94                                 | 96.78                             | 3.22                                                                                |
| S-80                | 143573.18        | 3361.79                 | 76328.11                             | 1166.88                                 | 98.99                             | 1.01                                                                                |

**Table S5.** Binding energies (eV) of S 2p and the calculated sulfur vacancy concentration for FeCoNiS<sub>x</sub>G<sub>y</sub>

| Samples                  |                                                           | S-20       | S-30     | S-40     | S-60     | S-80     |          |
|--------------------------|-----------------------------------------------------------|------------|----------|----------|----------|----------|----------|
| Area of S 2p<br>(CPS.eV) | S <sup>2-</sup> 2p <sub>3/2</sub>                         | 161.5 (eV) | 20304.4  | 34410.05 | 38360.23 | 49667.34 | 37859.55 |
|                          | S <sub>2</sub> <sup>2-</sup> 2p <sub>3/2</sub>            | 162.5(eV)  | 11205.47 | 20597.57 | 23897.33 | 40744.5  | 32371.62 |
|                          | S <sup>2-</sup> 2p <sub>1/2</sub>                         | 162.7 (eV) | 10371.71 | 17577.03 | 19594.83 | 25370.63 | 19339.08 |
|                          | S <sub>2</sub> <sup>2-</sup> 2p <sub>1/2</sub>            | 163.7 (eV) | 5723.88  | 10521.47 | 12207.02 | 20812.74 | 16535.78 |
|                          | S-S 2p <sub>3/2</sub>                                     | 164.3 (eV) | 5081.82  | 8936.93  | 9829.51  | 16266.93 | 13991.69 |
|                          | S-S 2p <sub>1/2</sub>                                     | 165.5 (eV) | 2595.85  | 4565.08  | 5021.02  | 8309.33  | 7147.11  |
|                          | SO <sub>3</sub> <sup>2-</sup> 2p <sub>3/2</sub>           | 167.1 (eV) | 3500.93  | 5167.06  | 6137.81  | 5564.23  | 4479.48  |
|                          | SO <sub>3</sub> <sup>2-</sup> 2p <sub>1/2</sub>           | 168.3 (eV) | 1788.31  | 2639.39  | 3135.26  | 2842.27  | 2288.17  |
|                          | SO <sub>4</sub> <sup>2-</sup> 2p <sub>3/2</sub>           | 168.9 (eV) | 5450.27  | 7473.96  | 8414.43  | 6513.33  | 6328.19  |
|                          | SO <sub>4</sub> <sup>2-</sup> 2p <sub>1/2</sub>           | 170.1 (eV) | 2784.06  | 3817.78  | 4298.18  | 3327.08  | 3232.51  |
|                          | S <sup>2-</sup> 2p <sub>1/2</sub> /S <sub>total</sub> (%) |            | 15.07    | 15.19    | 14.97    | 14.14    | 13.47    |

## Supplementary References

- 1 D. Larcher, G. Sudant, R. Patrice and J. M. Tarascon, *Chem. Mat.*, 2003, **15**, 3543-3551.
- 2 X. Liu, M. Gong, S. Deng, T. Zhao, J. Zhang and D. Wang, *J. Mater. Chem. A*. 2020, **8**, 113-1149.
